# Supplementary material for: Efficient and robust lithium metal electrodes enabled by synergistic surface activation–passivation of copper frameworks
Source: Royal Society of Chemistry journal article supplement (doi:10.1039/c9ta08779f), 2019-01-01
Supplement: c9ta08779f1.pdf [file c9ta08779f1.pdf]

## Electronic Supplementary Information

### **Efficient and Robust Lithium Metal Electrodes Enabled by Synergistic Surface Activation–Passivation of Copper Frameworks**

Jonghyeok Yun,<sup>‡a</sup> Eun-Seo Won,<sup>‡b</sup> Hyun-Seop Shin,<sup>c</sup> Kyu-Nam Jung,<sup>c</sup> and Jong-Won Lee<sup>\*a</sup>

<sup>a</sup> *Department of Materials Science and Engineering, Chosun University, 309 Pilmun-daero, Dong-gu, Gwangju 61452, Republic of Korea. E-mail: jongwon@chosun.ac.kr*

<sup>b</sup> *Department of Biochemical and Polymer Engineering, Chosun University, 309 Pilmun-daero, Dong-gu, Gwangju 61452, Republic of Korea*

<sup>c</sup> *Energy Efficiency Technologies and Materials Science Division, Korea Institute of Energy Research, 152 Gajeong-ro, Yuseong-gu, Daejeon 34129, Republic of Korea*

<sup>‡</sup> These authors contributed equally to this work.

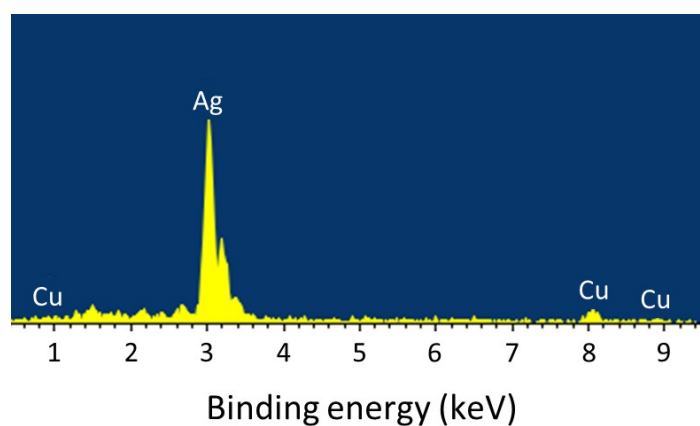

**Fig. S1** EDS spectrum of 3D-Cu@Ag subjected to GD for  $t_{\text{GD}} = 10$  s.

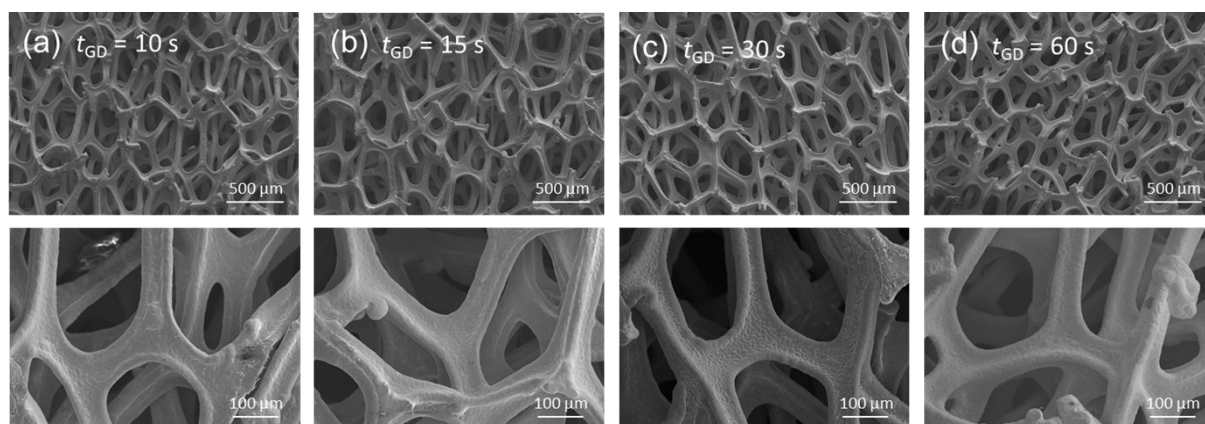

**Fig. S2** Low-magnification SEM images of 3D-Cu@Ag frameworks for (a)  $t_{\text{GD}} = 10$  s, (b)  $t_{\text{GD}} = 15$  s, (c)  $t_{\text{GD}} = 30$  s, and (d)  $t_{\text{GD}} = 60$  s.

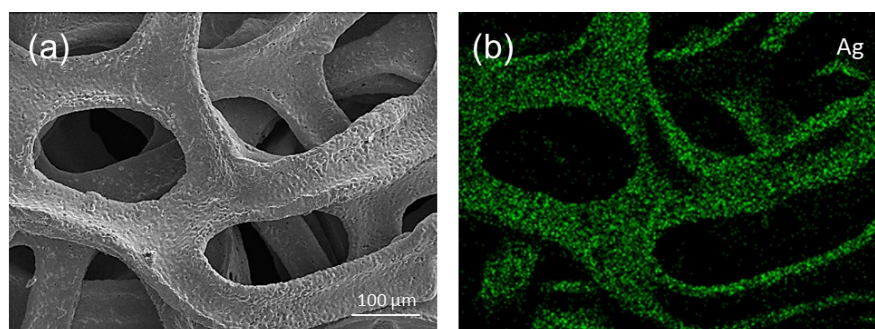

**Fig. S3** (a) SEM image (top view) of 3D-Cu@Ag for  $t_{\text{GD}} = 10$  s and (b) the corresponding EDS mapping result for Ag.

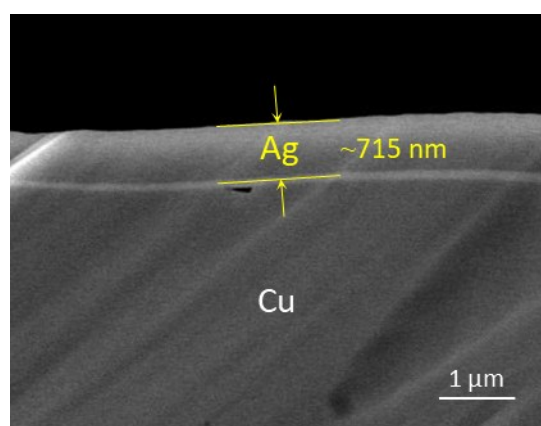

**Fig. S4** Cross-sectional SEM image of 3D-Cu@Ag for  $t_{\text{GD}} = 15$  s.

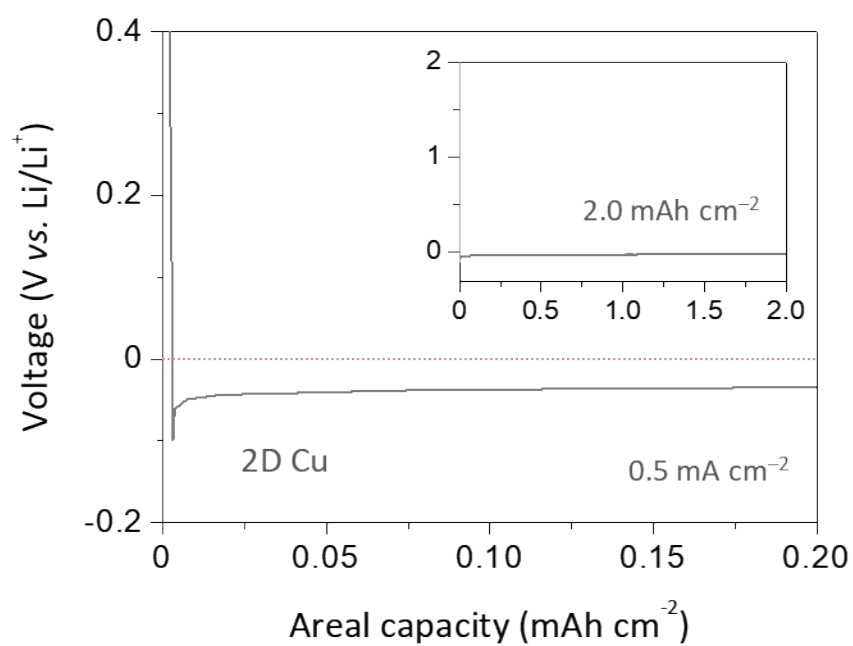

**Fig. S5** Voltage profile of the 2D Cu foil measured during Li plating ( $2.0 \text{ mAh cm}^{-2}$  at  $0.5 \text{ mA cm}^{-2}$ ).

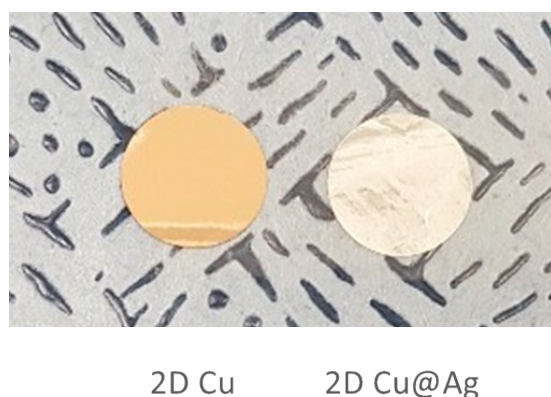

**Fig. S6** Photographs of 2D Cu and Cu@Ag foils. The 2D Cu@Ag foil was prepared by the GD process for  $t_{\text{GD}} = 10$  s.

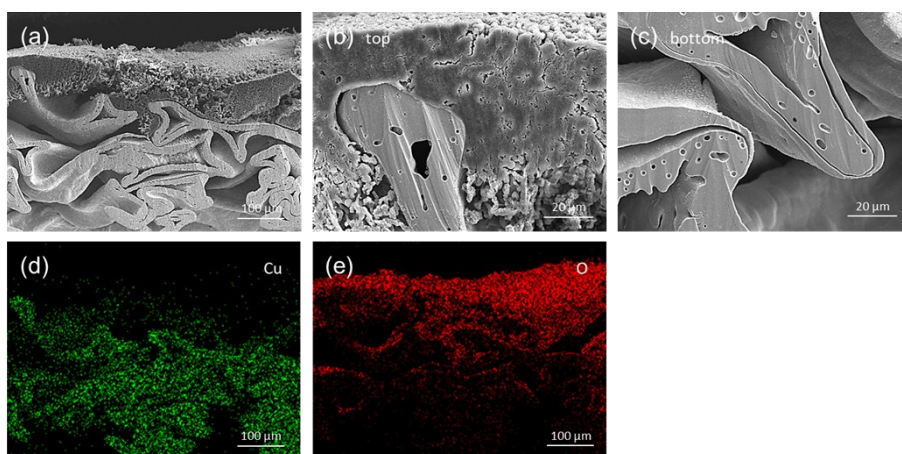

**Fig. S7** (a–c) Cross-sectional SEM images of 3D-Cu taken after Li plating ( $2.0 \text{ mAh cm}^{-2}$  at  $0.5 \text{ mA cm}^{-2}$ ) and (d, e) the corresponding EDS mapping results for Cu and O. The electrode was exposed to ambient atmosphere prior to EDS analysis, and the oxygen signal was recorded to determine the spatial distribution of  $\text{LiO}_x$ .

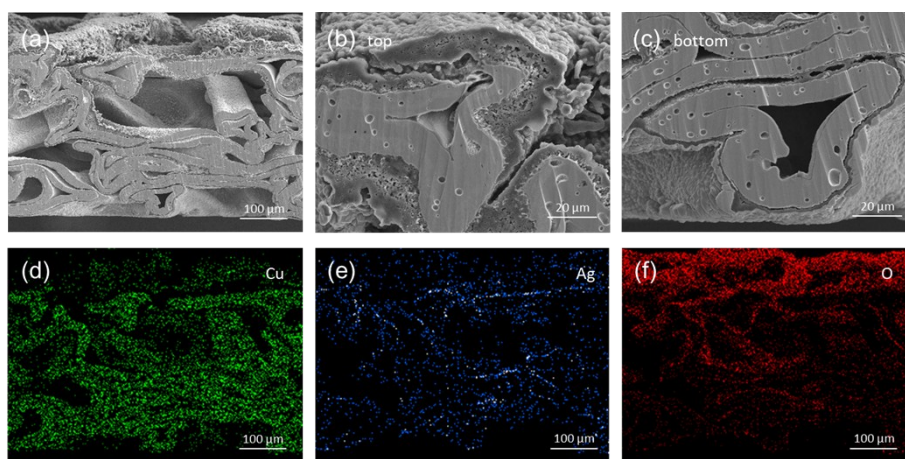

**Fig. S8** (a–c) Cross-sectional SEM images of 3D-Cu@Ag taken after Li plating ( $2.0 \text{ mAh cm}^{-2}$  at  $0.5 \text{ mA cm}^{-2}$ ) and (d–f) the corresponding EDS mapping results for Cu, Ag, and O. The electrode was exposed to ambient atmosphere prior to EDS analysis, and the oxygen signal was recorded to determine the spatial distribution of  $\text{LiO}_x$ .

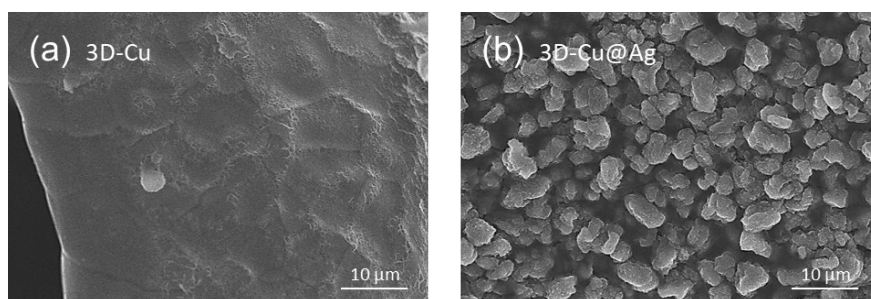

**Fig. S9** SEM images of (a) 3D-Cu and (b) 3D-Cu@Ag taken from the surfaces without Li dendrites. Li plating was performed with  $2.0 \text{ mAh cm}^{-2}$  at  $0.5 \text{ mA cm}^{-2}$ .

### Note 1. Equivalent circuit and modeling analysis of Li plating

Li plating in a 3D framework involves the two reactions: (1) Li plating on the top surface (on the separator side) (designated as '1' in Figure 5a) and (2) Li plating inside the pore (designated as '2' in Figure 5a).

- (1) Reaction 1: Li plating on the planar top surface involves interfacial charge-transfer and double-layer charging, and thus, it is simply described by an equivalent circuit ( $Z_s$ ) consisting of  $R_{ct,s}$  and  $C_{d,s}$  connected in parallel.
- (2) Reaction 2: Li plating in a pore involves  $\text{Li}^+$  migration in the electrolyte-filled pore and interfacial charge-transfer, double-layer charging. This process can be described by a modified transmission line ( $Z_p$ ) that has a network of distributed resistive and capacitive elements. As illustrated in Figure 5b,  $Z_p$  is composed of (i) series-connected  $r_{i,p}$  elements related to  $\text{Li}^+$  migration in the pore and (ii) parallel-connected  $r_{ct,p}$  and  $c_{d,p}$  associated with interfacial charge-transfer and double-layer charging.

Given that the two Li plating processes on the top surface (1) and in a pore (2) are independent of each other,  $Z_s$  and  $Z_p$  are connected in parallel. For simulations,  $Z_p$  was constructed with 20 distributed elements of  $r_{i,p}$ ,  $r_{ct,p}$ , and  $c_{d,p}$  (i.e.,  $n = 20$ ), and the following parameters and assumptions were used: electrode area =  $2.05 \text{ cm}^2$ ; electrode thickness =  $500 \text{ }\mu\text{m}$ ; cylindrical pore shape; pore diameter =  $250 \text{ }\mu\text{m}$ ; distance between pores =  $100 \text{ }\mu\text{m}$ ; electrolyte conductivity =  $1.0 \times 10^{-2} \text{ S cm}^{-1}$ ; double-layer capacitance =  $1.0 \times 10^{-5} \text{ F cm}^2$ ; exchange current density =  $1.0 \times 10^{-3} \text{ A cm}^{-2}$ .<sup>S1</sup>

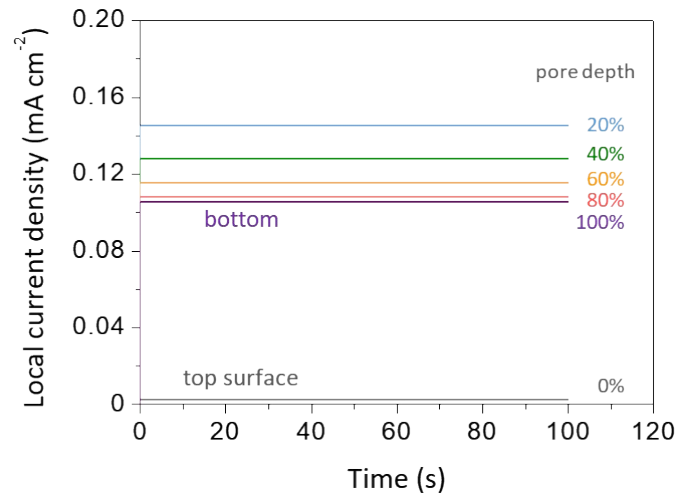

**Fig. S10** Local current densities on different locations of the 3D framework calculated using  $R_{ct,s} = 2,570 \text{ }\Omega \text{ cm}^2$  and exchange current density =  $0.67 \times 10^{-3} \text{ A cm}^{-2}$ . The total current density was  $0.5 \text{ mA cm}^{-2}$ .



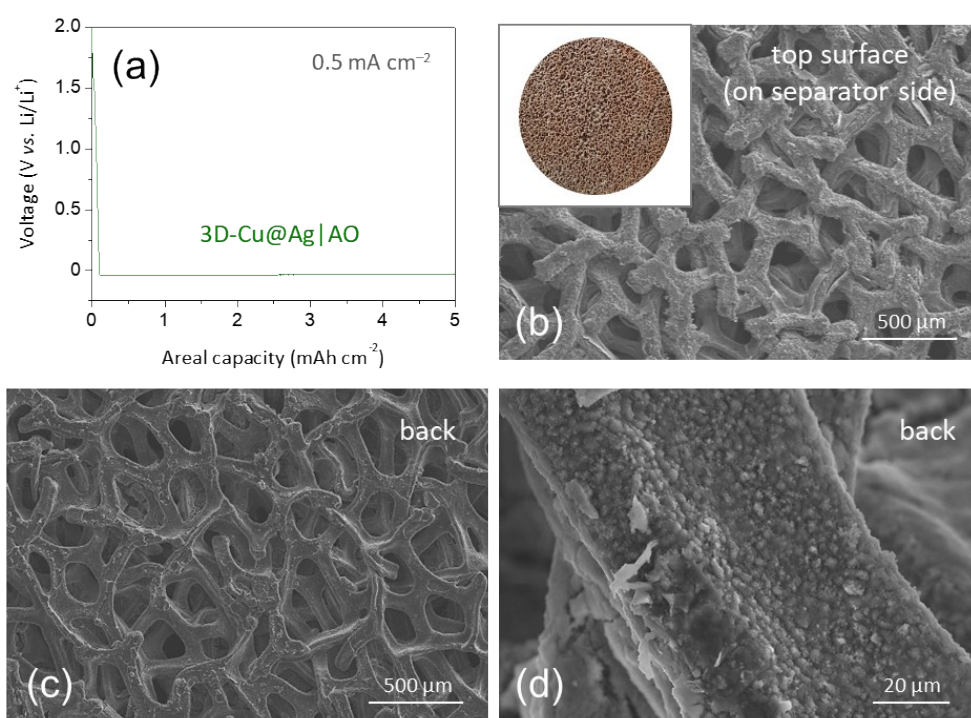

**Fig. S11** (a) Voltage profile of 3D-Cu@Ag|AO measured during Li plating ( $5.0 \text{ mAh cm}^{-2}$  at  $0.5 \text{ mA cm}^{-2}$ ) and (b–d) SEM images taken after Li plating: (b) top surface (facing the separator) and (c, d) back side. The photograph of the electrode was also included in the inset of (b).

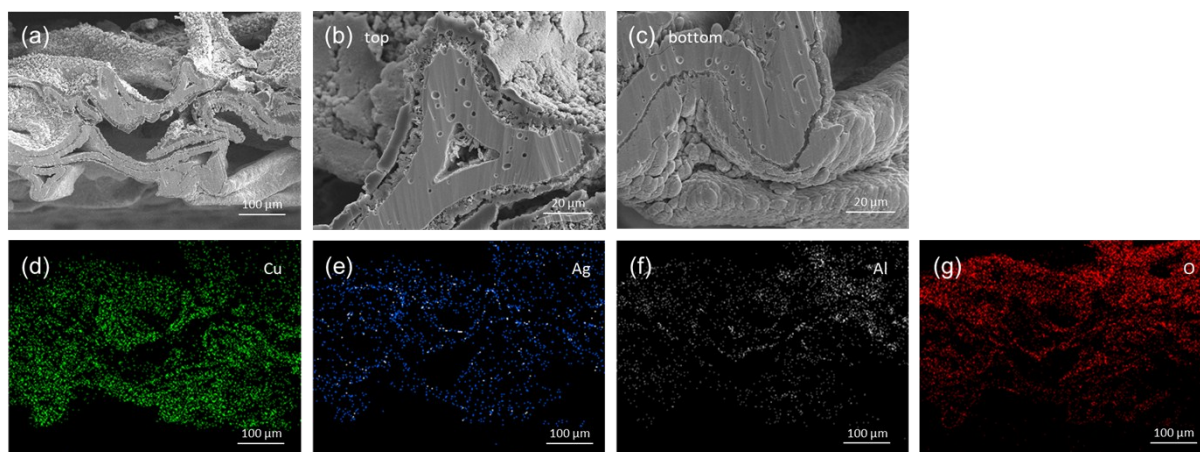

**Fig. S12** (a–c) Cross-sectional SEM images of 3D-Cu@Ag|AO taken after Li plating ( $2.0 \text{ mAh cm}^{-2}$  at  $0.5 \text{ mA cm}^{-2}$ ) and (d–g) the corresponding EDS mapping results for Cu, Ag, Al, and O. The electrode was exposed to ambient atmosphere prior to EDS analysis, and the oxygen signal was recorded to determine the spatial distribution of  $\text{LiO}_x$ . Note that the O signal originated from both  $\text{LiO}_x$  and  $\text{Al}_2\text{O}_3$ .

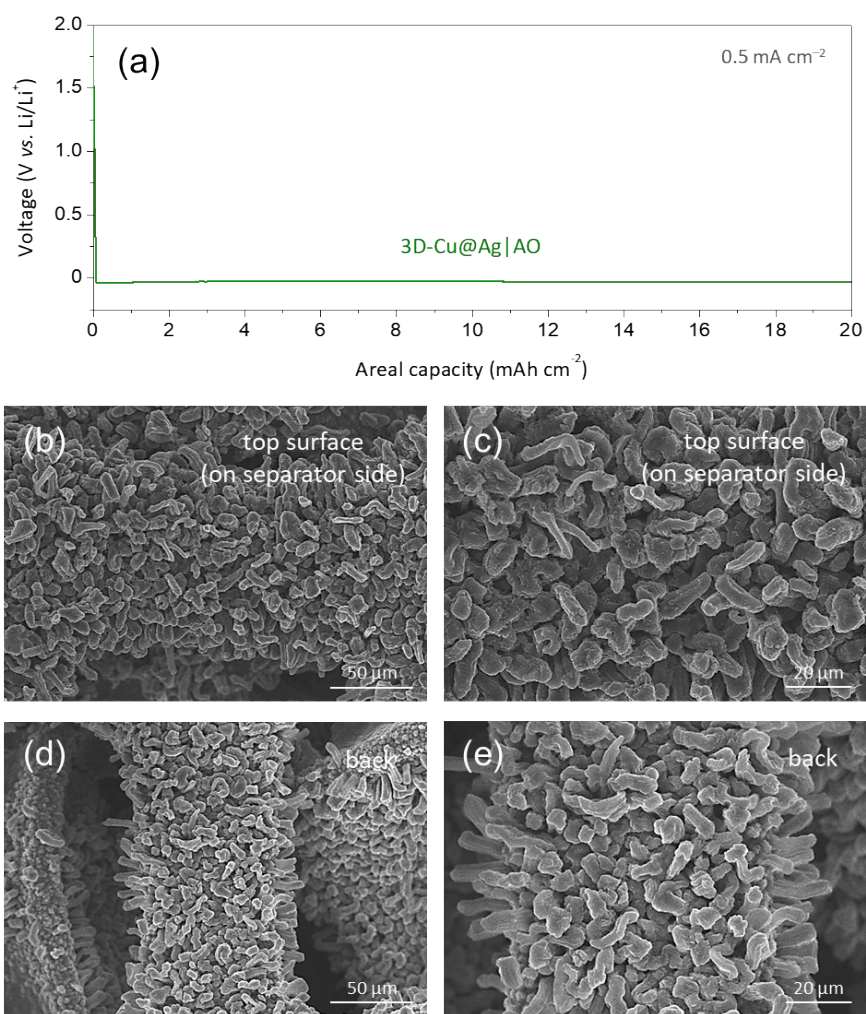

**Fig. S13** (a) Voltage profile of 3D-Cu@Ag|AO measured during Li plating ( $20 \text{ mAh cm}^{-2}$  at  $0.5 \text{ mA cm}^{-2}$ ) and (b–e) SEM images taken after Li plating: (b, c) top surface (facing the separator) and (d, e) back side. Note that Li deposits were observed on both top and back sides.



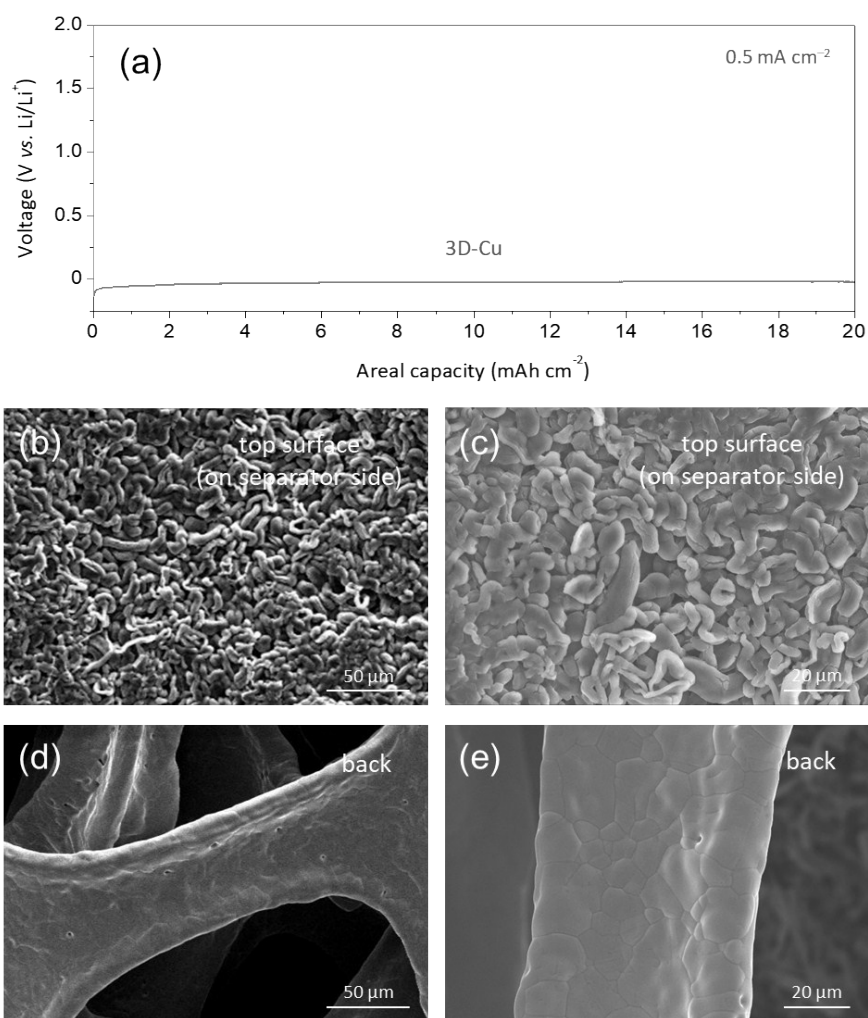

**Fig. S14** (a) Voltage profile of 3D-Cu measured during Li plating ( $20 \text{ mAh cm}^{-2}$  at  $0.5 \text{ mA cm}^{-2}$ ) and (b–e) SEM images taken after Li plating: (b, c) top surface (facing the separator) and (d, e) back side. Note that Li deposits were only observed on the top surface.

## Note 2. Estimation of Coulombic efficiencies (CEs)

The CE value was determined using the following procedure proposed by Adams et al.<sup>S2</sup>:

- (1) Pre-conditioning by Li plating to 2.0 mAh cm<sup>-2</sup> at 1.0 mA cm<sup>-2</sup> and subsequent Li stripping at 1.0 mA cm<sup>-2</sup> to 1.5 V vs. Li/Li<sup>+</sup>;
- (2) Plating of Li reservoir ( $Q_T = 2.0$  mAh cm<sup>-2</sup>) at 1.0 mA cm<sup>-2</sup>;
- (3) 10 cycles ( $n = 10$ ) of Li plating–stripping ( $Q_C = 1.0$  mAh cm<sup>-2</sup>) at 0.5, 1.0 or 2.0 mA cm<sup>-2</sup>;
- (4) Full Li stripping at 1.0 mA cm<sup>-2</sup> to 1.5 V vs. Li/Li<sup>+</sup> ( $Q_S$ ).

The average CE value was calculated by

$$CE = \frac{nQ_C + Q_S}{nQ_C + nQ_T} \quad (S1)$$

**Table S1** Coulombic efficiencies (CEs) of 3D frameworks measured at various current densities.

| Current density<br>(mA cm <sup>-2</sup> ) | CE (%) |          |             |
|-------------------------------------------|--------|----------|-------------|
|                                           | 3D-Cu  | 3D-Cu@Ag | 3D-Cu@Ag AO |
| 0.5                                       | 93.8   | 96.3     | 98.5        |
| 1.0                                       | 92.9   | 95.6     | 98.2        |
| 2.0                                       | 92.1   | 94.5     | 96.9        |

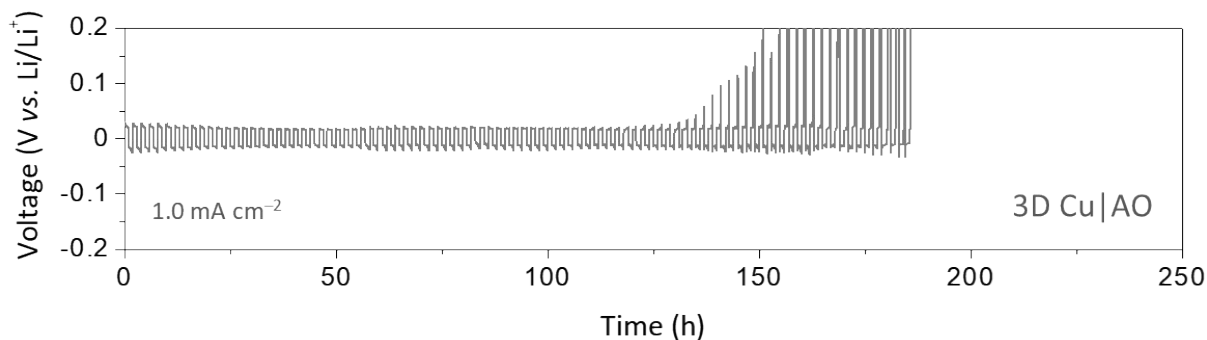

**Fig. S15** Cycling performance for 3D-Cu|AO at 1.0 mA cm<sup>-2</sup>.

**Table S2** Comparisons of technical approaches and electrochemical performance of various various Cu-based 3D frameworks for Li electrodes.

| Electrode                | Technical approach                                                                                   | Current density*<br>(mA cm <sup>-2</sup> ) | Capacity*<br>(mAh cm <sup>-2</sup> ) | CE<br>(%) | Reference |
|--------------------------|------------------------------------------------------------------------------------------------------|--------------------------------------------|--------------------------------------|-----------|-----------|
| 3D Cu                    | H <sub>2</sub> bubble dynamic template                                                               | 0.5                                        | 1                                    | ~97       | S1        |
| 3D Cu                    | Electrochemical dealloying of Cu–Zn                                                                  | 1                                          | 1                                    | 97.9      | S2        |
| VA-CuO-Cu                | Vertically aligned CuO nanosheets                                                                    | 0.5                                        | 1                                    | 94        | S3        |
| Cu <sub>2</sub> S NWs/Cu | In situ growth of Cu <sub>2</sub> S nanowires on Cu foam                                             | 1                                          | 1                                    | 95.5      | S4        |
| 3D Cu submicron skeleton | Cu(OH) <sub>2</sub> deposition, dehydration, reduction                                               | 0.5                                        | 1                                    | 97        | S5        |
|                          | <i>with 0.005M Li<sub>2</sub>S<sub>6</sub> additive</i>                                              | 0.5                                        | 1                                    | 98.5      | S6        |
| Cu NW                    | Solvent evaporation assisted assembly<br>( <i>with 0.005M Li<sub>2</sub>S<sub>8</sub> additive</i> ) | 1                                          | 1                                    | 98.6      | S7        |
| 3D Cu mesh               | Controlled mesh size                                                                                 | 0.5                                        | 1                                    | 93.8      | S8        |
| 3D Cu                    | Vacuum distillation of Cu–Zn                                                                         | 0.52                                       | 0.26                                 | ~90       | S9        |
| Cu-CuO-Ni                | Cu-CuO nanowire arrays on Ni foam                                                                    | 1                                          | 1                                    | ~95       | S10       |
| 3D Cu film               | Liquid Ga-induced alloying–dealloying                                                                | 0.5                                        | 1                                    | 98.2      | S11       |
|                          |                                                                                                      | 1                                          | 1                                    | ~97       | S12       |
| 3D-Cu@Ag AO              | Ag nanolayer<br>Al <sub>2</sub> O <sub>3</sub> passivating layer                                     | 1                                          | 1                                    | 98.2      | This work |

\* Test conditions for CE evaluations

## References

- S1. P. Arora, M. Doyle and R. E. White, *J. Electrochem. Soc.*, 1999, **146**, 3543.
- S2. B. D. Adams, J. Zheng, X. Ren, W. Xu and J.-G. Zhang, *Adv. Energy Mater.*, 2018, **8**, 1702097.
- S3. H. Qiu, T. Tang, M. Asif, X. Huang and Y. Hou, *Adv. Funct. Mater.*, 2019, **29**, 1808468.
- S4. H. Zhao, D. Lei, Y.-B. He, Y. Yuan, Q. Yun, B. Ni, W. Lv, B. Li, Q.-H. Yang, F. Kang and J. Lu, *Adv. Energy Mater.*, 2018, **8**, 1800266.
- S5. C. Zhang, W. Lv, G. Zhou, Z. Huang, Y. Zhang, R. Lyu, H. Wu, Q. Yun, F. Kang and Q.-H. Yang, *Adv. Energy Mater.*, 2018, **8**, 1703404.
- S6. Z. Huang, C. Zhang, W. Lv, G. Zhou, Y. Zhang, Y. Deng, H. Wu, F. Kang and Q.-H. Yang, *J. Mater. Chem. A*, 2019, **7**, 727.
- S7. C.-P. Yang, Y.-X. Yin, S.-F. Zhang, N.-W. Li and Y.-G. Guo, *Nat. Commun.*, 2015, **6**, 8058.
- S8. L.-L. Lu, J. Ge, J.-N. Yang, S.-M. Chen, H.-B. Yao, F. Zhou and S.-H. Yu, *Nano Lett.*, 2016, **16**, 4431.
- S9. Q. Li, S. Zhu and Y. Lu, *Adv. Funct. Mater.*, 2017, **27**, 1606422.
- S10. Y. An, H. Fei, G. Zeng, X. Xu, L. Ci, B. Xi, S. Xiong, J. Feng and Y. Qian, *Nano Energy*, 2018, **47**, 503.
- S11. S. Wu, Z. Zhang, M. Lan, S. Yang, J. Cheng, J. Cai, J. Shen, Y. Zhu, K. Zhang and W. Zhang, *Adv. Mater.*, 2018, **30**, 1705830.
- S12. Y. Shi, Z. Wang, H. Gao, J. Niu, W. Ma, J. Qin, Z. Peng and Z. Zhang, *J. Mater. Chem. A*, 2019, **7**, 1092.
